# Supplementary figures and images for: TMC7 deficiency causes acrosome biogenesis defects and male infertility in mice
Source: eLife journal article supplement (doi:10.7554/elife.95888), 2024-03-14

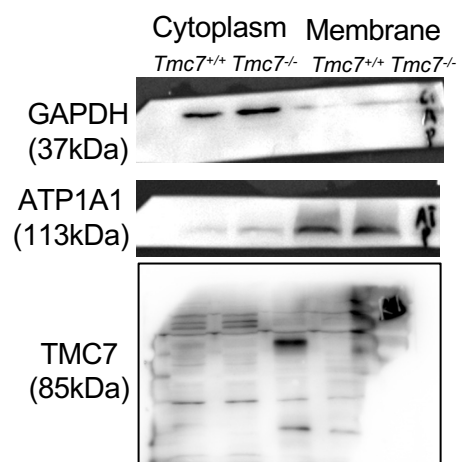

Supplement: fig1-figsupp1-data1 [file uncropped and labelled gels for Figure1-figure supplement1 .pdf › Figure 1-figure supplement 1-source data 1/uncropped and labelled gels for Figure1-figure supplement1 .pdf]

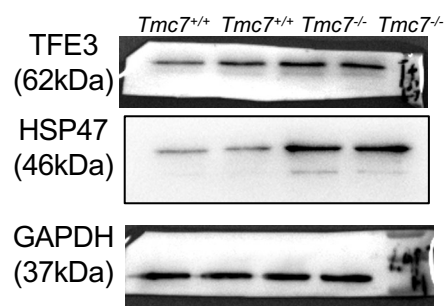

Supplement: fig3-data1 [file Uncropped and labelled gels for Figure 3.pdf › Figure 3-source data 1/Uncropped and labelled gels for Figure 3.pdf]

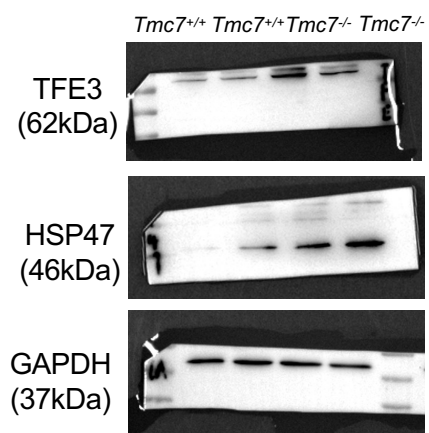

Supplement: fig3-figsupp1-data1 [file Uncropped and labelled gels for Figure 3-figure supplement 1.pdf › Figure 3-figure supplement 1-source data 1/Uncropped and labelled gels for Figure 3-figure supplement 1.pdf]

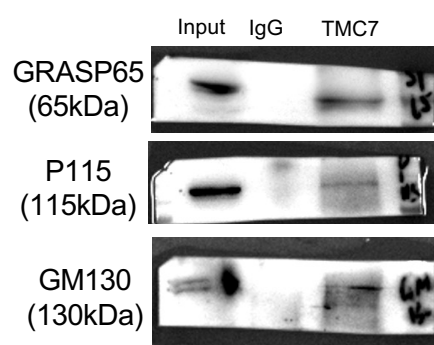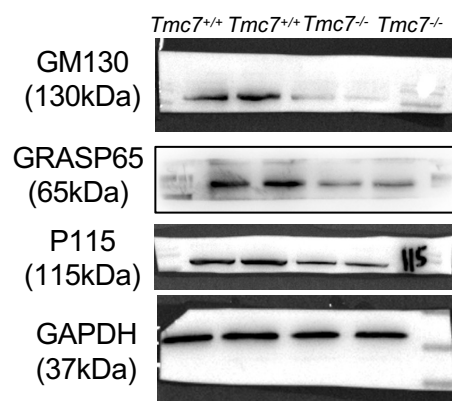

Supplement: fig4-data1 [file uncropped and labelled gels for figure 4.pdf › Figure 4-source data 1/uncropped and labelled gels for figure 4.pdf]

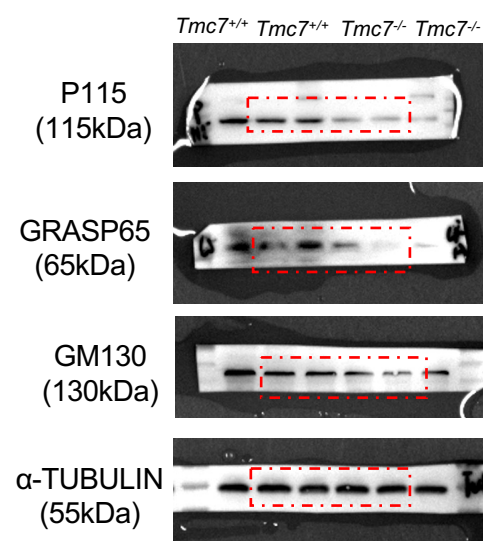

Supplement: fig4-figsupp1-data1 [file Uncropped and labelled gels for Figure 4-figure supplement 1.pdf › Figure 4-figure supplement 1-source data 1/Uncropped and labelled gels for Figure 4-figure supplement 1.pdf]

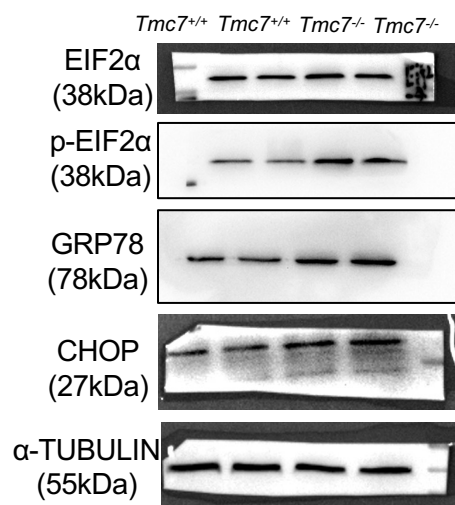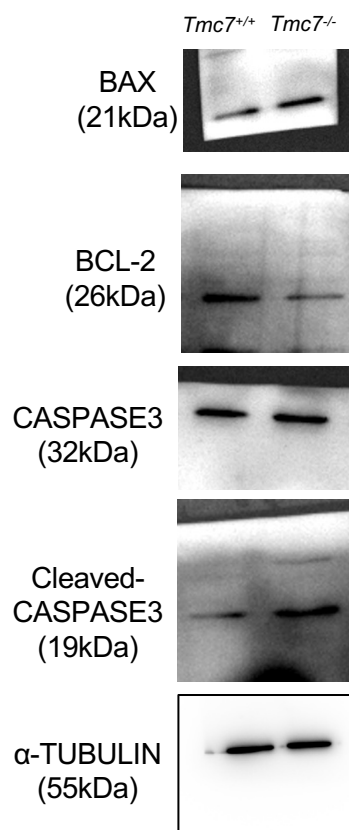

Supplement: fig5-data1 [file uncropped and labelled gels for Figure 5.pdf › Figure 5-source data 1/uncropped and labelled gels for Figure 5.pdf]

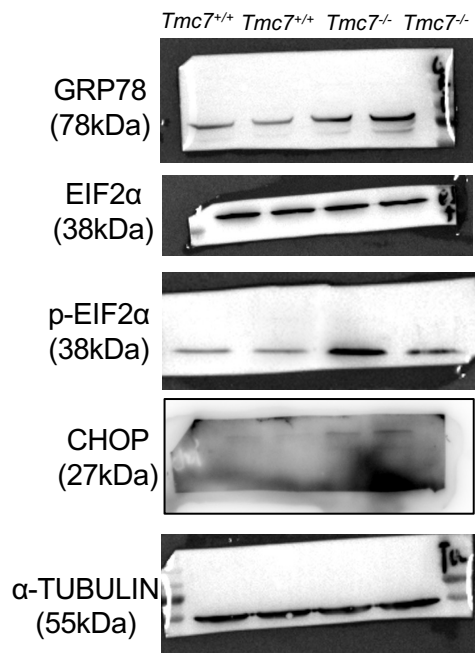

Supplement: fig5-figsupp1-data1 [file uncropped and labelled gels for figure5-supplemenr figure1.pdf › Figure 5-supplement figue1 source data 1/uncropped and labelled gels for figure5-supplemenr figure1.pdf]
